# Supplementary material for: Recombinant spider silk from aqueous solutions via a bio-inspired microfluidic chip
Source: PubMed Central journal article supplement (PMC5098227; doi:10.1038/srep36473), 2016-11-07
Supplement: srep36473-s1.pdf [file srep36473-s1.pdf]

# **Recombinant spider silk from aqueous solutions via a bio-inspired microfluidic chip**

*Qingfa Peng<sup>#,1</sup>, Yaopeng Zhang<sup>\*,#,1</sup>, Li Lu<sup>1</sup>, Huili Shao<sup>1</sup>, Kankan Qin<sup>2</sup>, Xuechao Hu<sup>1</sup>, Xiaoxia Xia*

*\*,2*

<sup>1</sup> State Key Laboratory for Modification of Chemical Fibres and Polymer Materials,  
College of Materials Science and Engineering, Donghua University, Shanghai,  
201620, China

<sup>2</sup> School of Life Sciences and Biotechnology, Shanghai Jiao Tong University,  
Shanghai 200240, China

## Supplementary Results

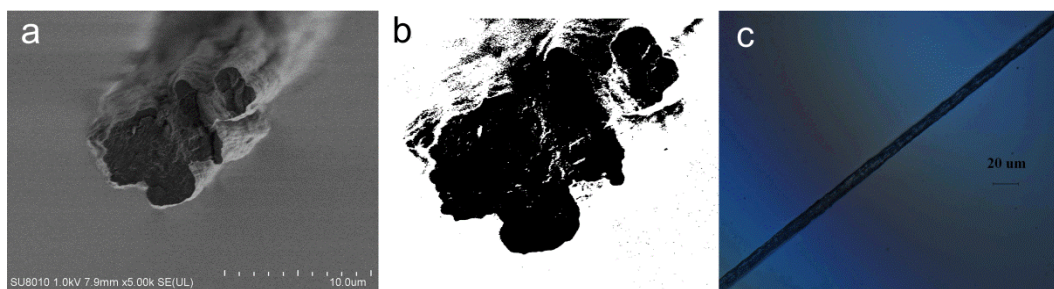

**Supplementary Figure 1.** Error of cross section area of recombinant spider silk fibres resulted from different measurements. (a) SEM image of cross section of WS-PSD. (b) Area of the irregular shape (dark region) was measured by software ImageJ (Area =55.2  $\mu\text{m}^2$ , Diameter =8.4  $\mu\text{m}$ ). (c) Diameter measured by polarizing microscope (area =59.4  $\mu\text{m}^2$ , diameter =8.7  $\mu\text{m}$ ).

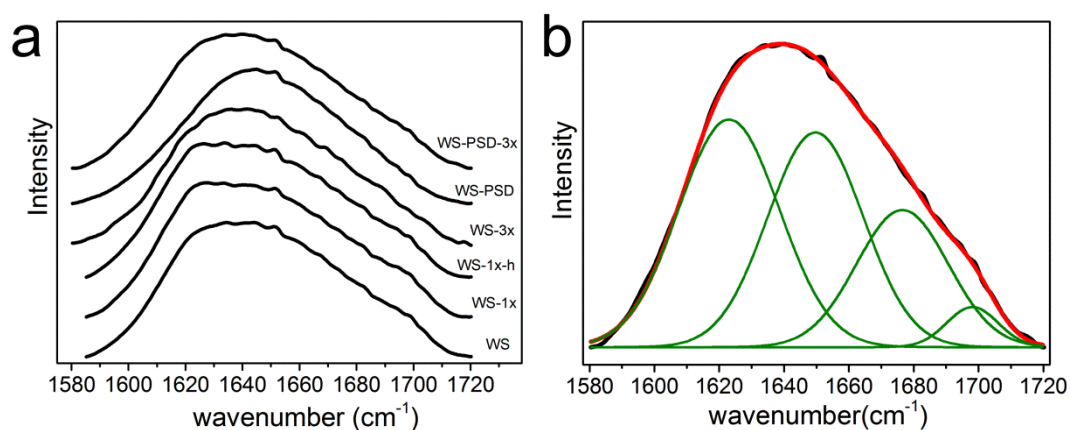

**Supplementary Figure 2.** Amide I region of infrared spectra of recombinant spider silk fibres. (a) After post-treatment and post-stretching, absorbance peaks of FTIR spectra clearly shift from 1645  $\text{cm}^{-1}$  (WDS) to 1624  $\text{cm}^{-1}$  (WS-PSD-3x), which indicates the formation of more  $\beta$ -sheet structures. (b) WS fiber is soluble in water and show mainly amorphous structure. Post-treated fibers of WS show more  $\beta$ -sheet structures. Typical deconvolution process of amide I region is illustrated in right and the detailed results are provided in Table 1.

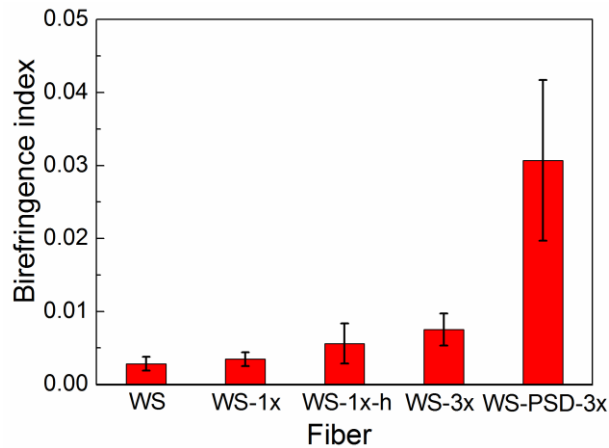

**Supplementary Figure 3.** Birefringence indexes of recombinant spider silk fibres.

Data represent the mean and standard deviation of at least five filaments.

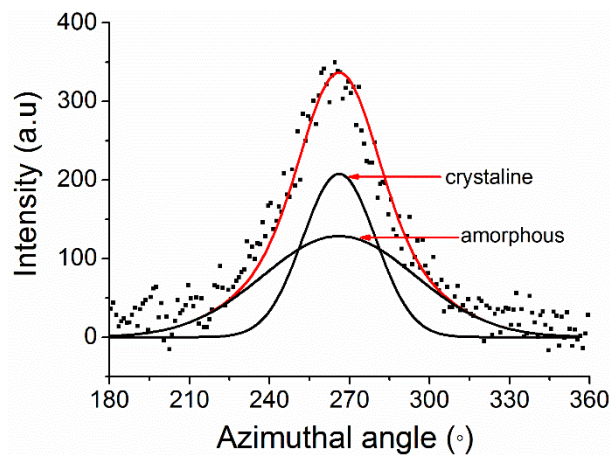

**Supplementary Figure 4.** 1D azimuthal intensity profile of the radially integrated (120) peak with Gaussian fits for WS-PSD-3X. The peak was fitted as sums of two Gaussians, corresponding to crystalline (narrow) and amorphous (broad) distributions. The orientation factor  $f_c$  of the crystalline and  $f_a$  of the amorphous were calculated according to Hermans orientation function.
